# Supplementary material
Source: PubMed Central journal article supplement (PMC4147720)

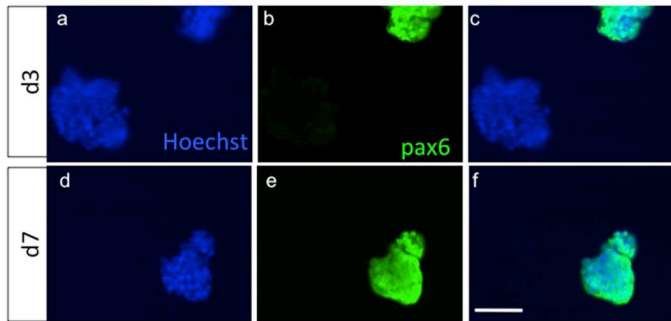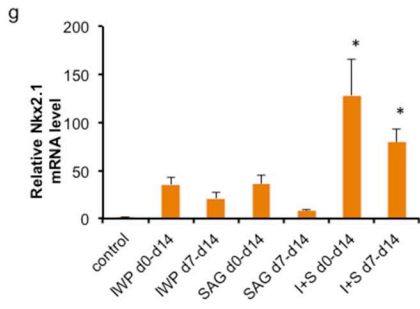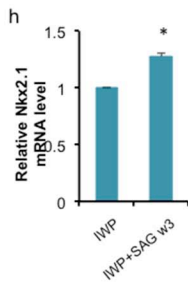

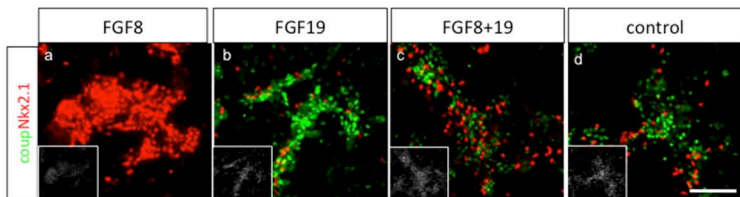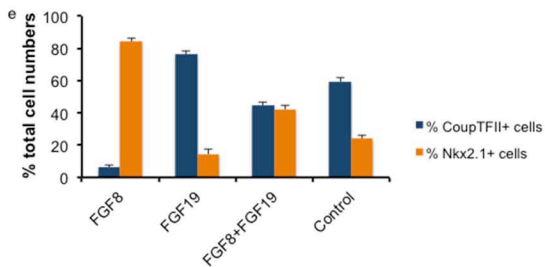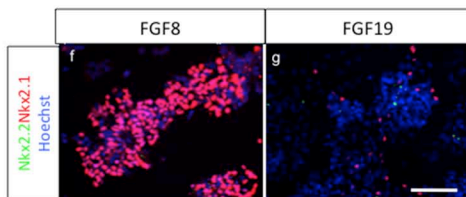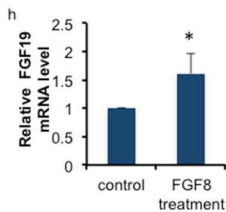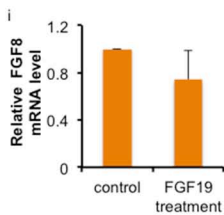

Supplementary Fig. 3 (Chung) Top

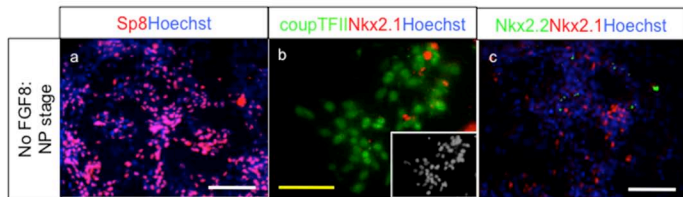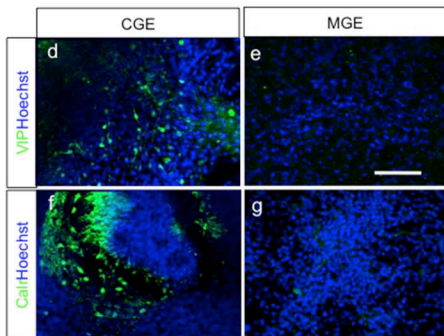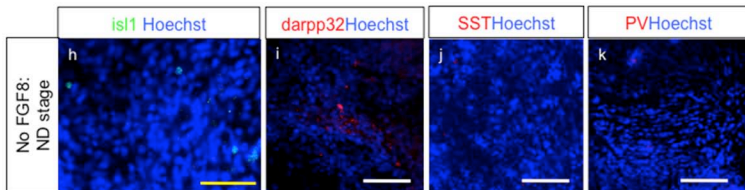

Supplementary Fig. 4 (Chung) Top

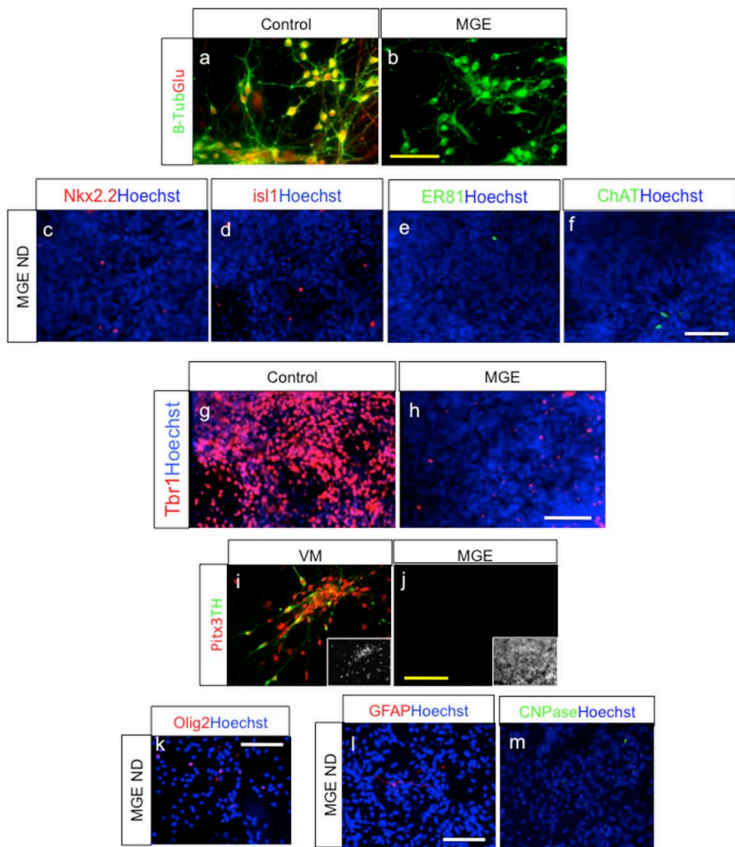

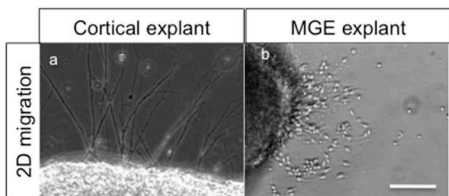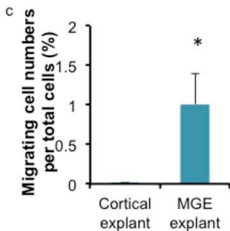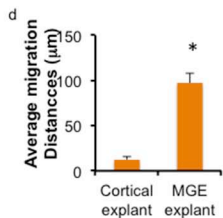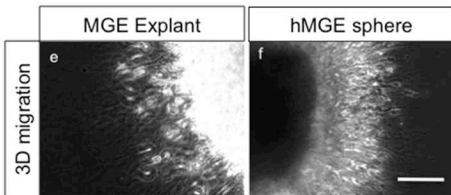

Supplementary Fig. 6 (Chung) Top

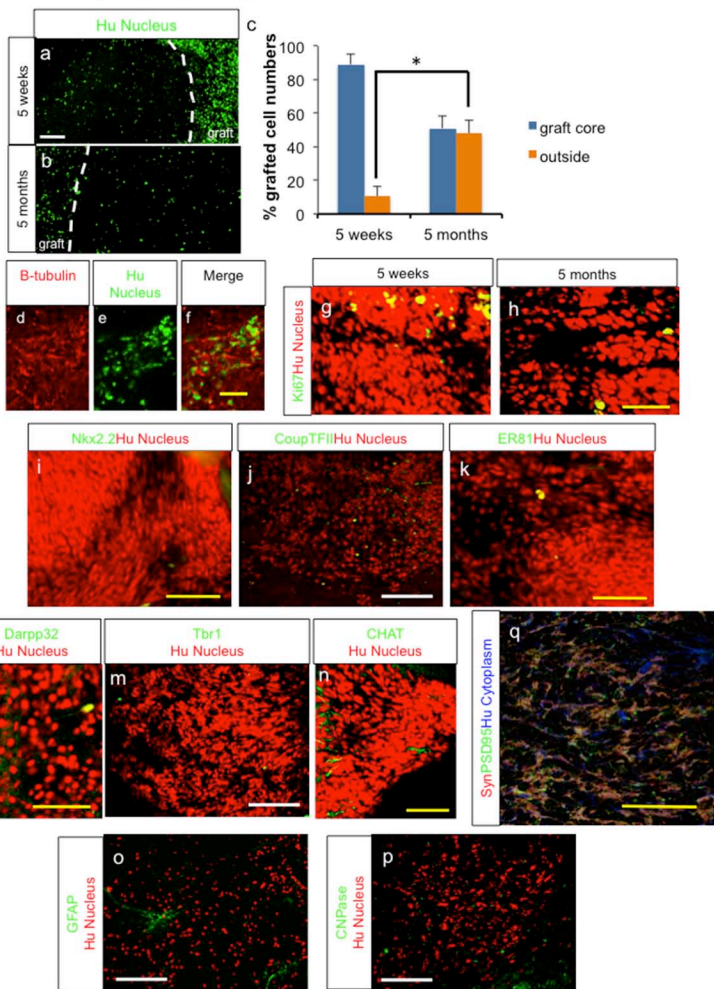

Supplement: NIHMS576039-supplement-Supp_FigureS1-S6.pdf [file NIHMS576039-supplement-Supp_FigureS1-S6.pdf]
